# Supplementary material
Source: Springer Nature journal article supplement (https://www.springermedizin.de/resource/supplementary/12943_2009_678_MOESM5_ESM.pdf/9554562)

A.

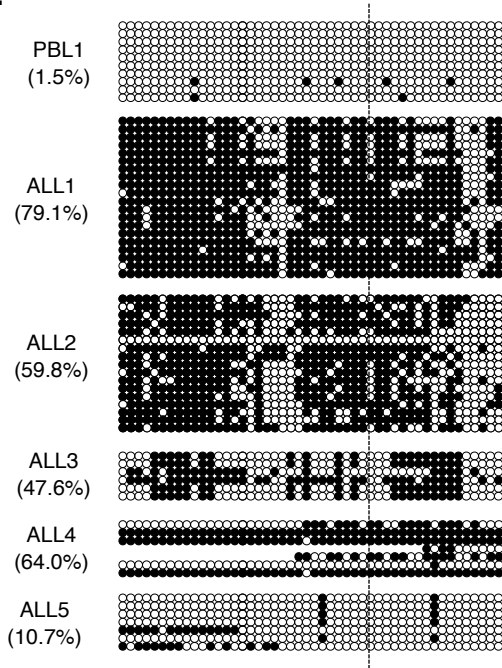

B.

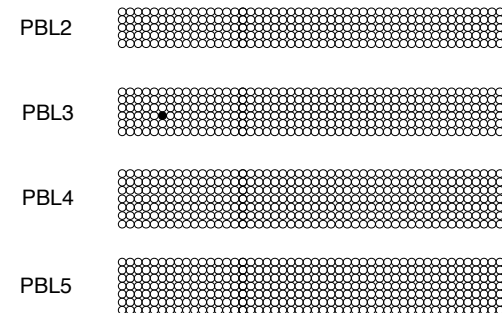

C.

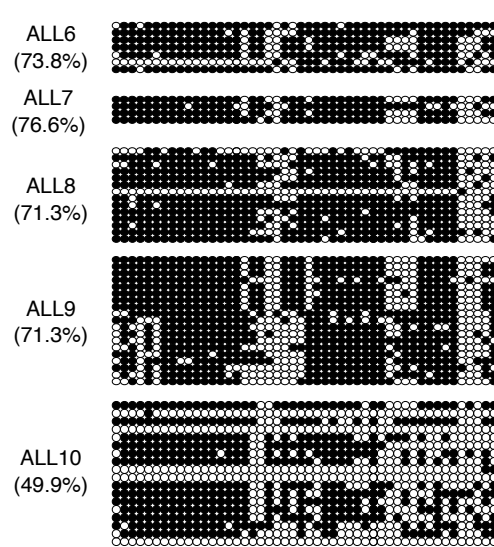

D.

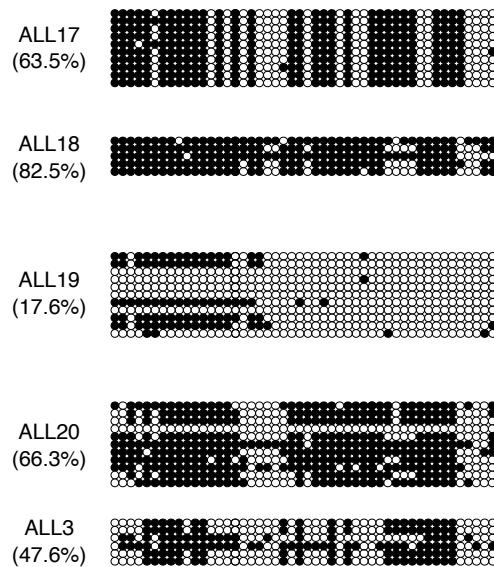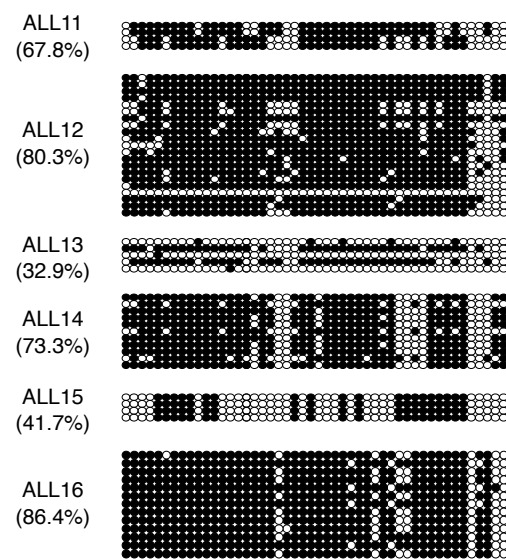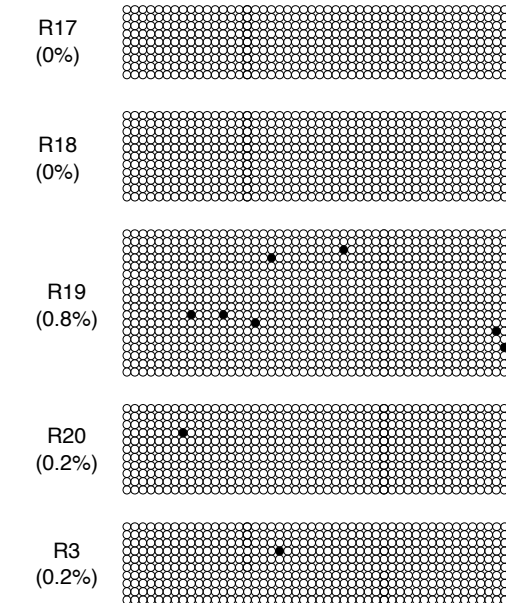

Supplement: MOESM5 [file 9554562]
